# Supplementary figures and images for: High-Level Clonal FGFR Amplification and Response to FGFR Inhibition in a Translational Clinical Trial
Source: Oxford University Press journal article supplement (doi:10.1158/2159-8290.cd-15-1246), 2016-05-14

# Supplementary FIGURE 3

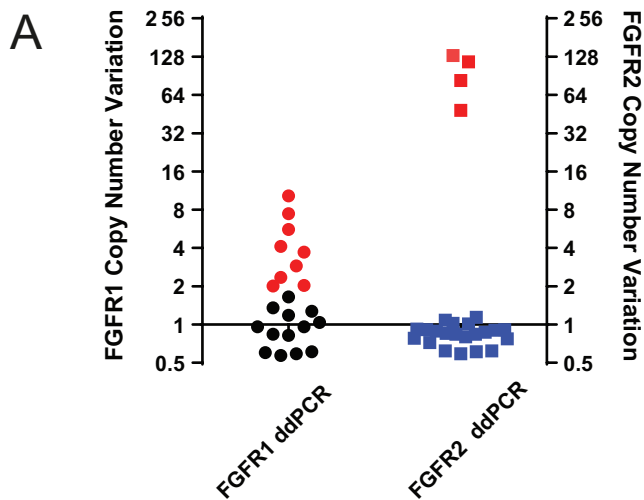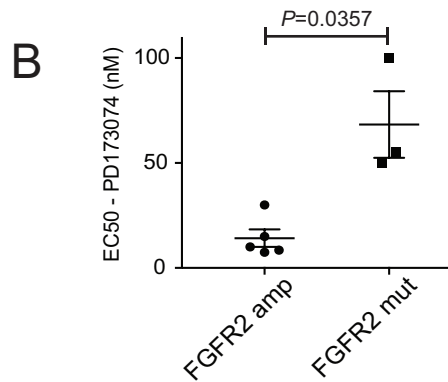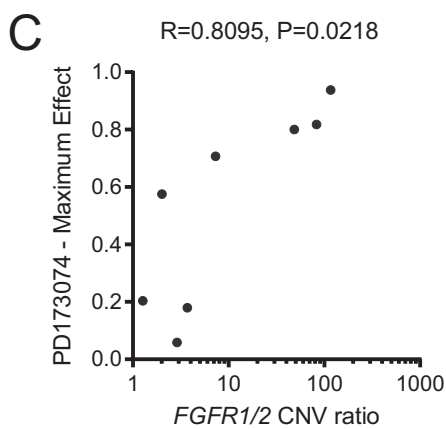

**D**

Patient 316, PDX FG42

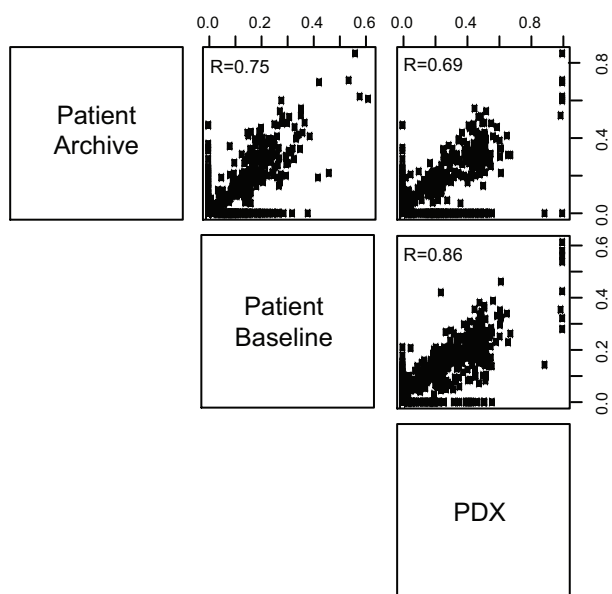

Patient 269, PDX FG51

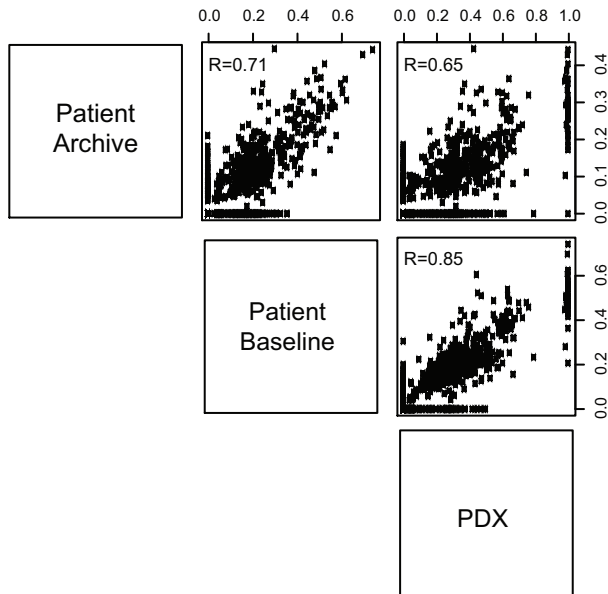

Supplement: 21598290cd151246-sup-157069_1_supp_0_v72z8b.pdf [file 21598290cd151246-sup-157069_1_supp_0_v72z8b.pdf]
